# Supplementary material for: The circadian clock protein REVERBα inhibits pulmonary fibrosis development
Source: PubMed Central journal article supplement (PMC6969503; doi:10.1073/pnas.1912109117), 2019-12-26
Supplement: pnas.1912109117.sapp.pdf [file pnas.1912109117.sapp.pdf]

# Supplemental Information

## Supplementary Materials and Methods:

### UK Biobank and HES Analysis

The UK biobank recruited 502,620 individuals in the UK population between 2006 and 2010. Participants filled in a questionnaire regarding lifestyle, medical conditions along with their demographic information. The questionnaire included questions on chronotype, shift work and sleep duration and has been validated in other studies (1). The medical information collected by the UK biobank was supplemented by the English hospital episodes data set (HES) (2) accessed January 2019. Subjects were excluded *a priori* if they took sleep altering medication (3) or had obstructive sleep apnoea. Pulmonary fibrosis was defined using UK biobank codes 1121,1122 and 1115 combined with ICD 10 codes J84.1 and J84.9 in the HES dataset.

Shift work was defined using a computer administered questionnaire where participants who worked were asked if they worked shifts. Possible answers were “never/rarely”, “sometimes”, “usually”, “always”, “prefer not to answer” and “do not know”. If the participant checked either of the last two options, they were excluded from shift work analysis. Patients were defined as non-shift workers if they ticked the box “never/rarely”. Chronotype was defined in a similar manner using the same touchscreen questionnaire based on the morningness-eveningness questionnaire. Due to the low incidence of pulmonary fibrosis the two answers signifying a morning chronotype were pooled and the same was done for the evening chronotype. This single item has been shown to correlate with sleep timing and dim-light melatonin onset (4). Sleep duration was obtained from the same touchscreen questionnaire where subjects in response to the question “About how many hours sleep do you get in every 24 hours? (please include naps)?”(5) with the response being recorded in hours.

### Microarray analysis

Geo2R (6) was used to analyse GSE47460 generated by the lung genome research consortium (7) who performed microarray analysis on lung tissue from patients with

pulmonary fibrosis as well as control subjects. Patients were classified as having clinically significant pulmonary fibrosis based on reduced lung function (FVC<80%predicted) and a pathological diagnosis of UIP.

### ***In vivo* Bleomycin model of pulmonary fibrosis**

Male mice (aged 10–14 weeks) were dosed intratracheally with bleomycin (Sigma) (50 $\mu$ L) or vehicle (saline) under anaesthesia (isoflurane). Bleomycin and vehicle treated animals were analysed 28 days after exposure unless stated otherwise. Hydroxyproline was measured on snap frozen lungs, histological analysis was performed on lungs inflated with 4% paraformaldehyde (PFA) that were then left to fix overnight. For precision cut lung slices, lungs were harvested 14-21 days after bleomycin.

### **Hydroxyproline measurement of tissue collagen**

Hydroxyproline was measured using a colourimetric assay as previously described (8). Briefly, whole lungs were dissected, weighed and homogenised in a mortar and pestle under liquid nitrogen. ~50mg of tissue was dried (80°C for 1 hour) and then hydrolysed in 6N HCl at 100°C for 20 hours. Samples were then oxidised in Citrate-Acetate Buffer with Chloramine T allowing colourimetric determination of hydroxyproline concentration with p-diamethylaminobenzaldehyde in Isopropanol/perchloric acid.

### **Bioluminescence Microscopy**

Precision-cut organotypic lung slices (PCLS) were prepared as described before (9). Briefly, the trachea was cannulated with flexible polyethylene tubing of 0.58 mm in diameter. The lungs were inflated with 2 ml of freshly prepared agarose (2% w/v in HBSS media at 38°C) or until the accessory lobe was fully inflated. The trachea was tied off with 2/0 nylon and the lungs were then placed on ice until the agarose had set (approx. 15mins). The lungs were then fixed onto the stage of a vibrating microtome (Campden instruments integraslice 7550mm) and sectioned at 250 $\mu$ m at 4°C.

After sectioning the slices underwent sequential washes of DMEM to remove agarose and were then placed on a cell culture insert (MilliCell cell culture inserts 0.04 $\mu$ m pores) in luciferin containing culture media (phenol red-free DMEM with 3.5 mg/mL glucose, 25 U/mL

penicillin, 25 µg/mL streptomycin, 0.1 mM luciferin, 10 mM HEPES-NaOH)(9). Brightfield imaging was captured on a Zeiss Axiovert 100 with a Plan Achromat 5× 0.16 NA objective equipped with an XL incubator to maintain the cells at 37°C, 5% CO<sub>2</sub>. Bioluminescence images were obtained using a 2.5x objective (Zeiss) and captured using a cooled Andor iXon Ultra camera over a 30 minute integration period acquired using Micro-Manager software (Version 1.4).

Captured images were analysed using MATLAB R2018a to define amplitude and phase of oscillations. In brief a grid was placed across the image where each square represented 1500µm<sup>2</sup>. The same analysis grid was placed on subsequent images captured 30 minutes apart allowing phase and amplitude to be calculated for each defined area. Spikes over time were removed via Hampel outlier identification (10) in order to reduce the influence of random photons and then baseline subtraction was performed for each square using a 24 hour moving average. The acrophase was then calculated by locating the local maxima of the time series. The prominence and relative timing of the acrophase were used to calculate respectively amplitude (in arbitrary units) and phase differences (in hours) per square. Amplitude and phase was then plotted into a heatmap where the location of each squares corresponds with its morphological position in the original lung slice.

### **Hoechst staining**

After bioluminescent imaging the tissue was fixed in 4% PFA for 2 hours and stored in 70% ethanol at 4°C until Hoechst staining. PCLS were then incubated in PBS with 2 µM Hoechst 33342 for 15 minutes. Staining solution was removed and replaced by PBS. Nuclei were imaged using a Leica TCS SP8 AOBS upright confocal microscope to obtain a 3D optical stack of the whole lung slice. The image presented in the results section is a maximum intensity projection of this 3D stack. Using morphological landmarks, the field of view of this image was matched with the field of view of the previous bioluminescence recording.

### **Lumicycle Bioluminescence Analysis**

Precision cut lung slices and primary lung fibroblasts were also analysed with a lumicycle bioluminescence recorder after being placed on cell culture inserts in a 35mm dish containing media with luciferin as previously described (11). To investigate the effects of

lung inflation, lungs were either inflated with 2% agarose solution and then set at 4°C or kept uninflated at 4°C. Sections of lung were then cut and placed in the lumicycle.

### **Histology and Immunohistochemistry**

Paraformaldehyde fixed whole lungs or precision cut lung slices were paraffin embedded and cut sectioned at 5µm. To visualise collagen, sections were dewaxed, rehydrated and stained with Picrosirius Red/Fast Green. For αSMA IHC dewaxed and rehydrated sections were processed for antigen retrieval followed by blocking for endogenous peroxidase with BLOXALL and Mouse IgGs (Vector Laboratories). Sections were then incubated with anti-αSMA antibody overnight prior to detection and staining (MOM ImmPRESS Peroxidase Polymer Kit (Vector Laboratories) and DAB (3'3'-diaminobenzidine)). Control immunohistochemistry was also performed on sections without the addition of either primary or secondary antibodies to confirm specificity. αSMA IHC was graded (0-4) by scorers blinded to the sample details based on intensity of the αSMA stain and the percentage of tissue affected.

### **Generation of primary mouse lung fibroblasts**

Whole lungs were dissected to ~2mm<sup>3</sup> pieces and washed in Hank's Balanced Salt Solution (HBSS, Sigma-Aldrich). This tissue was then Collagenase (1.5mg/ml in HBSS, Sigma-Aldrich) digested at 37°C for 2 hours. After Collagenase incubation the homogenate was passed through a 40µm cell strainer, washed in HBSS and finally re-suspended in culture media (DMEM +10% FBS) for fibroblast cell expansion.

### **Cell transfections**

Twenty-four hours post-seeding (imFLs, 1.5 X 10<sup>3</sup> cells/cm<sup>2</sup>; Mrc5 0.5 X 10<sup>4</sup> cells/cm<sup>2</sup>) siRNA (15ng siRNA/cm<sup>2</sup>; mouse *Nr1d1* (ON-TARGETplus SMARTpool #L-051721-00, Dharmacon), mouse *Tbpl1* (ON-TARGETplus SMARTpool #L-058115-01, Dharmacon), mouse *Itgb1* (ON-TARGETplus SMARTpool #L-040783-01, Dharmacon), human *NR1D1* (Silencer Select #s18387, Ambion), human *TBPL1* (ON-TARGETplus SMARTpool #L-017254-00, Dharmacon) and Non-targeting (ON-TARGETplus Control Pool #D-001810-10, Dharmacon)) transfections were performed using DharmaFECT 1 (Dharmacon) reagent.

To create a Rev-erb $\alpha$ -GFP plasmid Phusion HF Taq was used to clone Rev-erb $\alpha$  using the following primers CGGCGGATCCATGACGACCCTGGACT (forward) and GCGCGGCCGCTCACTGGGCGTCCACCCG (reverse) on cDNA extracted from A549 cells according to manufacturer's instructions. The PCR product was then inserted into pGEM-T easy Vector (Promega) and then sub-cloned into a pcDNA3-gfp vector (Addgene). The subsequent plasmid was then sequenced. Tbp1-GFP (Origene) and control EGFP (Addgene) transfections were performed 24 hours post-seeding using Fugene HD (2 $\mu$ g plasmid/10 $\mu$ l Fugene HD, Promega) as per the manufacturer's instructions.

### **Immunofluorescence**

For  $\alpha$ SMA staining, cells in 35mm dishes were fixed in 4% PFA/0.2% Triton X, followed by ice cold methanol fixation ( $\alpha$ SMA). For focal adhesions proteins cells were exposed to ice-cold cytoskeleton buffer (12) for 10 minutes followed by 4% PFA fixation for a further 10 minutes. Cells were then incubated with primary antibodies (indicated in the relevant figures) for 1 hour at room temperature and then washed prior to incubation with a species specific fluorescent secondary antibody (Alexa Flour) for one hour. Following this cell nuclei were then stained with DAPI before dishes were washed, mounted (Prolong Diamond) and cover slipped.

For ECM analysis cells were lysed in 20mM NH<sub>4</sub>OH, 0.5% Triton X-100 in PBS, the DNA was digested using DNase1 (Roche) and the remaining protein was stained with collagen-1 antibody.

Fiji (13) was used to analyse the immunofluorescence images.  $\alpha$ SMA and collagen-1 were quantified using a macro which measured intensity above a threshold which was set the same for all experimental conditions. Focal adhesions were quantified via subtracting the background (rolling ball 50), then a fft band pass filter was applied allowing a threshold to be applied which identified the focal adhesions. All samples were coded and images were quantified by a user blinded to the cell transfection conditions.

## **Antibodies**

The following antibodies were used throughout the paper;  $\alpha$ SMA (mouse, Leica, NCL-L-SMA), Collagen Type 1 (goat, Southern Biotech, 1310-01), pro-Collagen1 (rabbit, R1038, Acris), Integrin $\beta$ 1(Mouse) (Rat, BD Pharmingen, 550531), Integrin $\beta$ 1(Human/active) (Mouse, Millipore, MAB2079Z), Vinculin (mouse, Sigma-Aldrich, V9131), Tensin1 (rabbit, Sigma-Aldrich, SAB4200283), Paxillin (mouse, 610569, BD Biosciences), REV-ERB $\alpha$  (mouse monoclonal, as previously described (14)), TBPL1 (rabbit, Proteintech, 12258-1-AP), GFP (rabbit, Abcam, ab290), GAPDH (rabbit, Proteintech, 10494-1-AP). Alexa Fluor fluorescent secondary antibodies (anti-rabbit-488 (A11008); anti-rat-568 (A11077) and anti-mouse-647 (A21235)) were purchased from Invitrogen.

## **RNA-seq**

siRNA transfected mLF-hT and Mrc5 cells were lysed and RNA was extracted using the ReliaPrep RNA miniprep system. RNA was sequenced on an Illumina HiSeq 4000. Analysis of these data was performed using the Ingenuity Pathway Analysis software (QIAGEN).

## **Human lung slice and fibroblast culture**

Human lung tissue was collected from patients undergoing carcinoma resection (control) or for fibrotic tissue from human explants after transplantation. Tissue which the pathologist deemed suitable for research was then inflated with 2-3% low boiling point agarose, with the agarose being allowed to set at 4°C. Precision cut lung slices were then cut at 400 $\mu$ m on a vibrating microtome and cultured in DMEM media. TGF $\beta$  (2ng/ml), GSK4112 (10 $\mu$ M) or Vehicle (DMSO) treatments were then performed each day with the slices being lysed after 4 days for qPCR analysis or 7 days for supernatant analysis.

To prepare a lung fibroblast culture, fibrotic and non-fibrotic tissue was dissected to  $\sim 2\text{mm}^3$  pieces and placed in culture media in a 15cm<sup>2</sup> dish scored to create points of adhesion. Following 2-4 weeks, outgrown fibroblasts were trypsinised and passaged for further culture. For treatments, cells were plated in 24 well plates ( $1 \times 10^5$  cells/well) and TGF $\beta$  (2ng/ml), GSK4112 (10 $\mu$ M) or Vehicle (DMSO) was added in serum-free culture media for 24 hours after which cells were lysed for qPCR analysis.

## **ELISA**

Collagen 1a1 concentration in cell culture media from precision cut lung slices were assessed using a DuoSet® kit (R&D Systems) as per manufacturer's instructions.

## **Western immunoblotting**

For whole cell analyses, protein lysates were generated by lysis in RIPA buffer (Cell Signalling) containing Protease Inhibitor Cocktail (Roche) and 1 mM PMSF. Extracellular matrix protein was prepared by adding 4X NuPAGE LDS Sample Buffer (Novex) directly to the tissue culture plastic and scraping to collect the ECM after the prior removal of the cells with extraction buffer (20mM NH<sub>4</sub>OH. 0.5% Triton X-100 in PBS). SDS-PAGE was performed using the mini-PROTEAN system (Bio-Rad) and protein levels were determined by chemiluminescent detection of target proteins on nitrocellulose membranes.

## **qPCR**

RNA was extracted using the ReliaPrep RNA miniprep system (Promega) prior to the generation of cDNA (RNA-to-cDNA kit, Applied Biosystems). qPCR was performed using PowerUp SYBR Green (Applied Biosystems) and QuantiTect Primer Assays (QIAGEN).

## **Statistics**

For data from the biobank binary logistic regression was used to examine the relationships between pulmonary fibrosis and chronotype, shift work or sleep duration. Both unadjusted and adjusted analyses were performed taking into account the known epidemiological associations for pulmonary fibrosis (age, sex and smoking) (15) as well as BMI.

Other data was evaluated using Student's t-test, one-way ANOVA or two-way ANOVA for multiple comparisons as indicated. Significant values are shown as  $p < 0.05$  (\*),  $p < 0.01$  (\*\*).

## **Animals**

All animals were maintained in 12h:12h light:dark (LD) with food and water supplied *ad libitum*. mPER2::luc transgenic mice were previously described (16). The Rev-erba<sup>fl/fl</sup> mouse (Rev-erbaDBD<sup>m</sup>) and Cre drivers targeting club cells (CCSP<sup>icre</sup>) and myeloid cells (Lysm<sup>cre</sup>) are

as previously described (14). The PDGFR $\beta$ <sup>cre</sup> mouse was a kind gift from Henderson and has been previously described (17). The Bmal1<sup>fl/fl</sup> mouse has been previously described (9).

### **Cell Lines**

mLF-hT cells have been recently described (18) and were a kind gift from Hinz. Briefly the primary murine lung fibroblasts had telomerase reverse transcriptase virally introduced preventing them from becoming senescent. Human lung fibroblast MRC-5 cells were purchased from the ATCC.

### **Chemicals**

Bleomycin (sulfate from *Streptomyces verticillus*) was obtained from Sigma. The REVERB agonist, GSK 4112 (19) has been previously described and were obtained from Sigma.

### **Study Approval**

Ethical approvals for both human and animal studies were obtained. The UK Biobank study was approved by the National Health Service National Research Ethics Service (ref. 11/NW/0382), use of human tissue was approved following permission from the Health Research Authority (11/NE/0291) and (14/NW/0260). All participants gave informed consent.

Animal procedures were carried out in accordance with the Animals Scientific Procedures Act (1986) and were approved by the animal welfare and ethical review body.



**Supplementary Figures:**

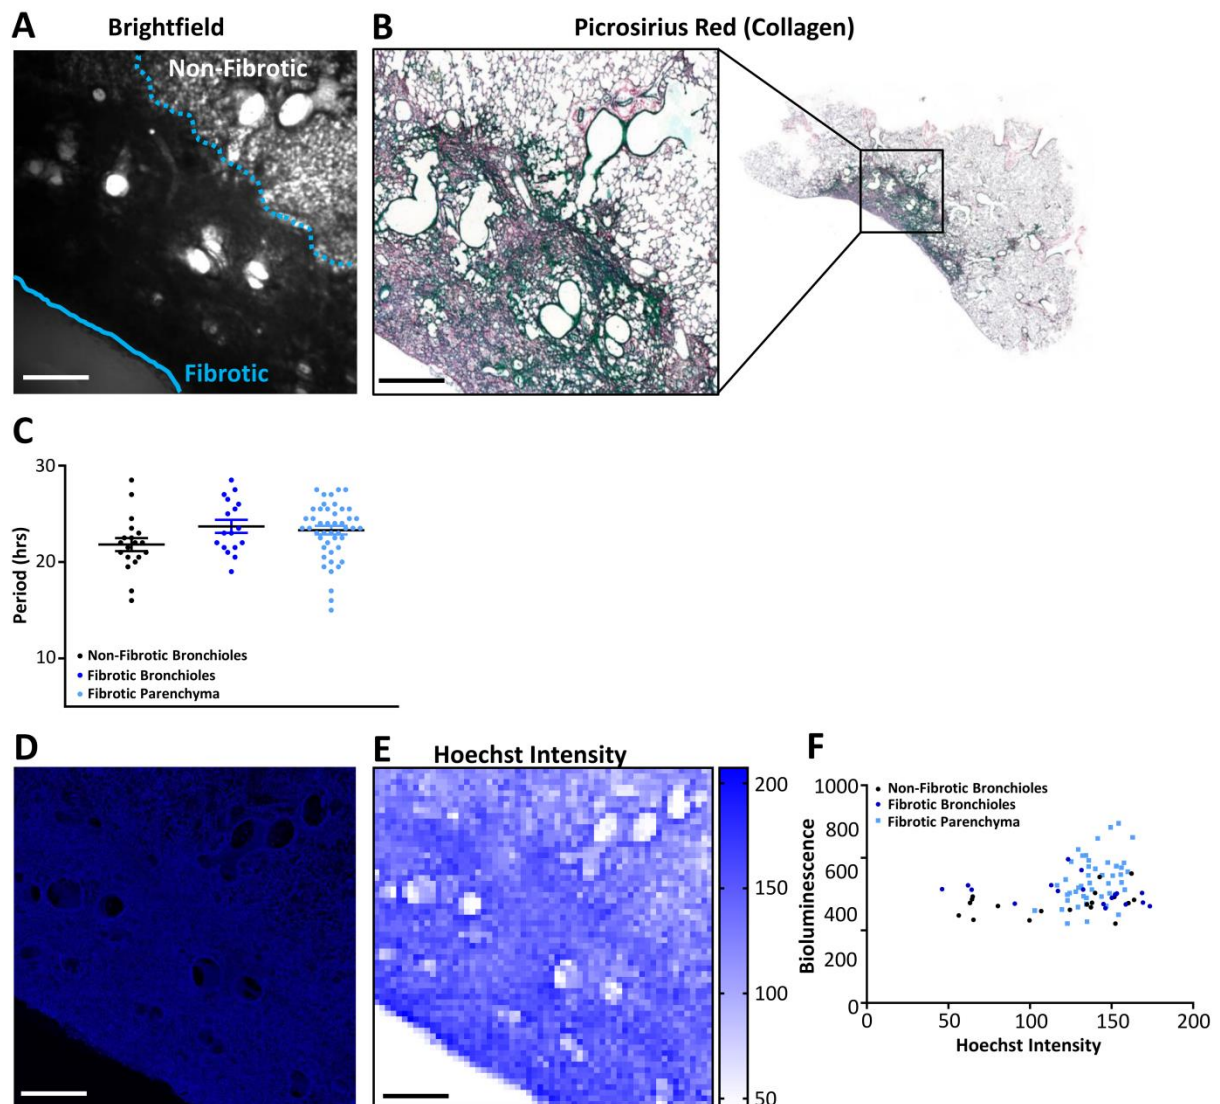

**Figure S1 - Analysis of bioluminescence in fibrotic mPER2::luc precision cut lung slices**

Bleomycin (3U/kg) was given *in vivo* to a mPER2::luc mouse, with lung slices being analysed 14 days later **A**) Brightfield image of the precision cut lung slice used in Fig. 1A (scale bar, 500 $\mu$ m) **B**) Histological section of the precision cut lung slice used in Fig. 1A stained with picrosirius red (scale bar, 500 $\mu$ m) **C**) Period length in the precision cut lung slice from Fig. 1C between fibrotic bronchioles, non-fibrotic bronchioles and fibrotic parenchyma (mean $\pm$ SEM) **D**) Immunofluorescence of the precision cut lung slice used in Fig. 1A following Hoechst staining (scale bar, 500 $\mu$ m) **E**) Heatmap (1500 $\mu$ m<sup>2</sup>) of Hoechst intensity in the same precision cut lung slice (scale bar, 500 $\mu$ m) **F**) Hoechst intensity was plotted against bioluminescence for the precision cut lung slice in different anatomical structures.

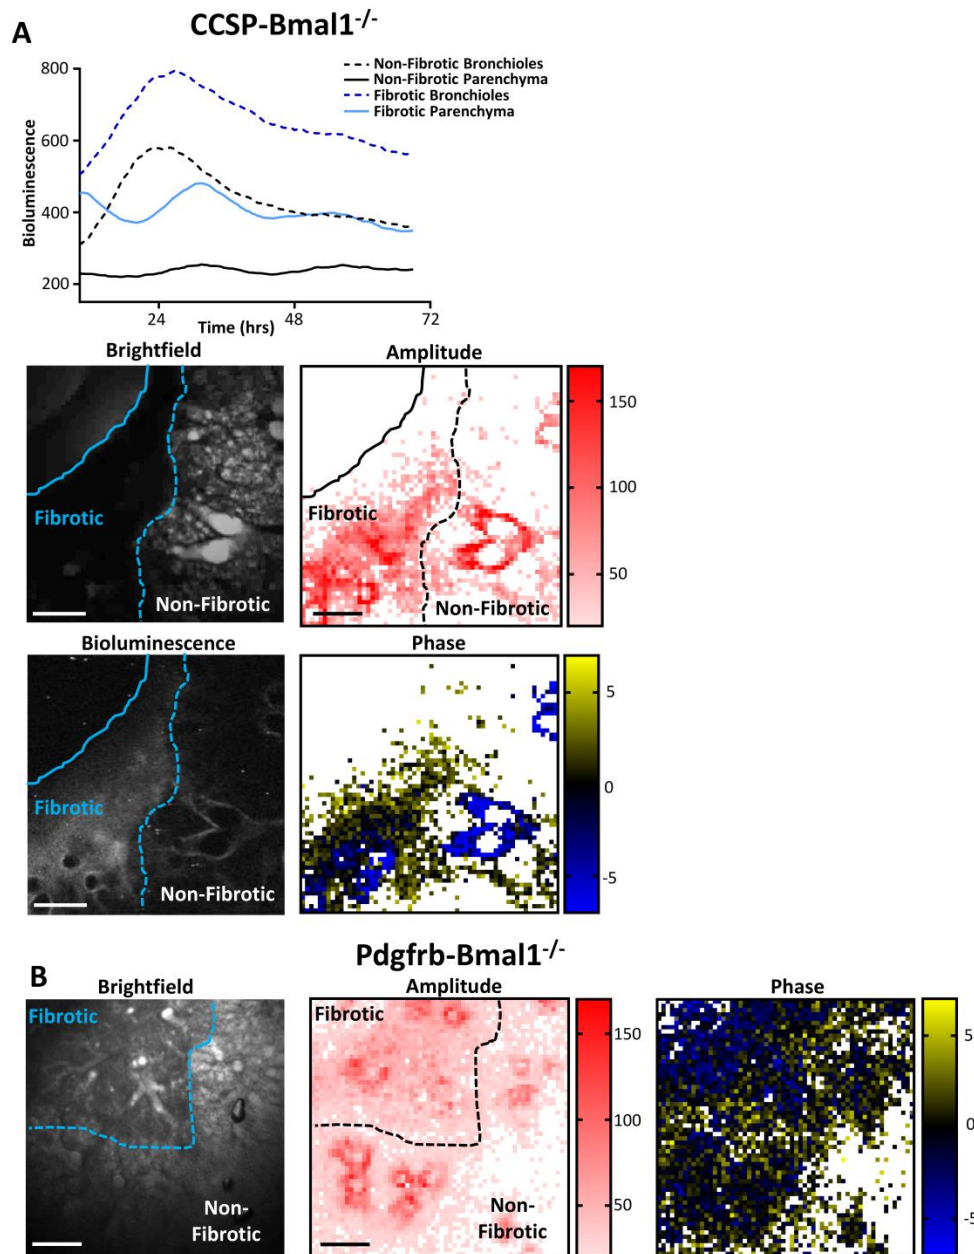

**Figure S2 - Analysis of bioluminescence in fibrotic mPER2::luc precision cut lung slices from CCSP-BMAL1<sup>-/-</sup> mice and Pdgfrb-BMAL1<sup>-/-</sup> mice**

**A)** Bioluminescent intensity, Brightfield and Bioluminescent images along with Amplitude and Phase heatmaps ( $1500\mu\text{m}^2$ ) of mPER2::luc oscillations in the precision cut lung slice from a CCSP-BMAL1<sup>-/-</sup> mouse 14 days after *in vivo* bleomycin (3U/kg) challenge (Scale bars,  $500\mu\text{m}$ , data is representative of three separate experiments). **B)** Brightfield image, Amplitude and Phase heatmaps ( $1500\mu\text{m}^2$ ) of mPER2::luc oscillations from the precision cut lung slice (shown in Fig. 1E) from the Pdgfrb-BMAL1<sup>-/-</sup> mouse 14 days after *in vivo* bleomycin (3U/kg) challenge; Scale bars,  $500\mu\text{m}$  (data is representative of three separate experiments)

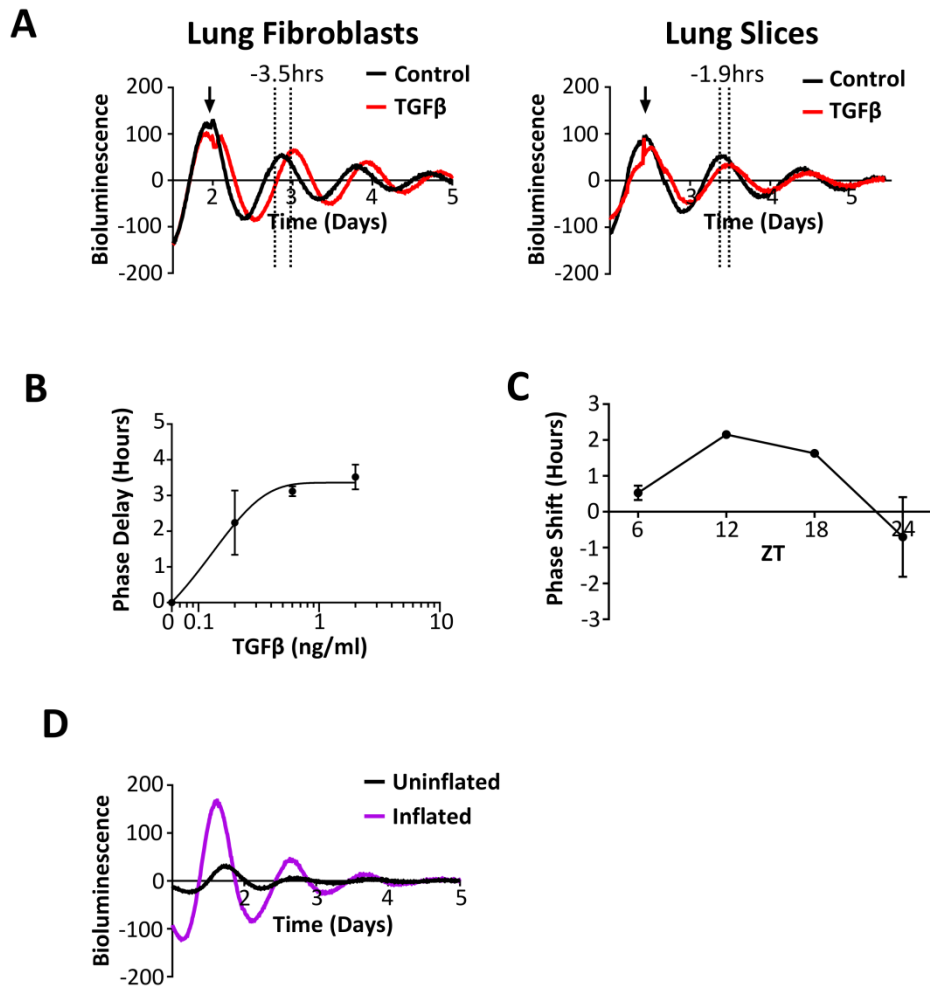

**Figure S3 - Effect of TGF $\beta$  and lung inflation on PER2 rhythmicity in primary murine fibroblasts and lung slices**

**A)** Bioluminescence was plotted against time for fibroblasts and precision cut lung slices from mPER2::luc mice. TGF $\beta$  (2ng/ml) was added at the time-point indicated by the arrow (data from one representative experiment but is representative of three experiments). Dotted lines show the subsequent peaks in phase. **B)** Dose response curve of mPER2::luc primary lung fibroblasts following treatment with TGF $\beta$  (data is plotted from three experiments, mean $\pm$ SEM) **C)** Phase response curve in mPER2::luc precision cut lung slices following TGF $\beta$  (2ng/ml) stimulation (4 slices per time point all from separate animals, mean $\pm$ SEM) **D)** Lungs from mPER2::luc mice were inflated or left uninflated. Bioluminescence was then plotted against time (representative data from one animal, but is representative of three separate animals).

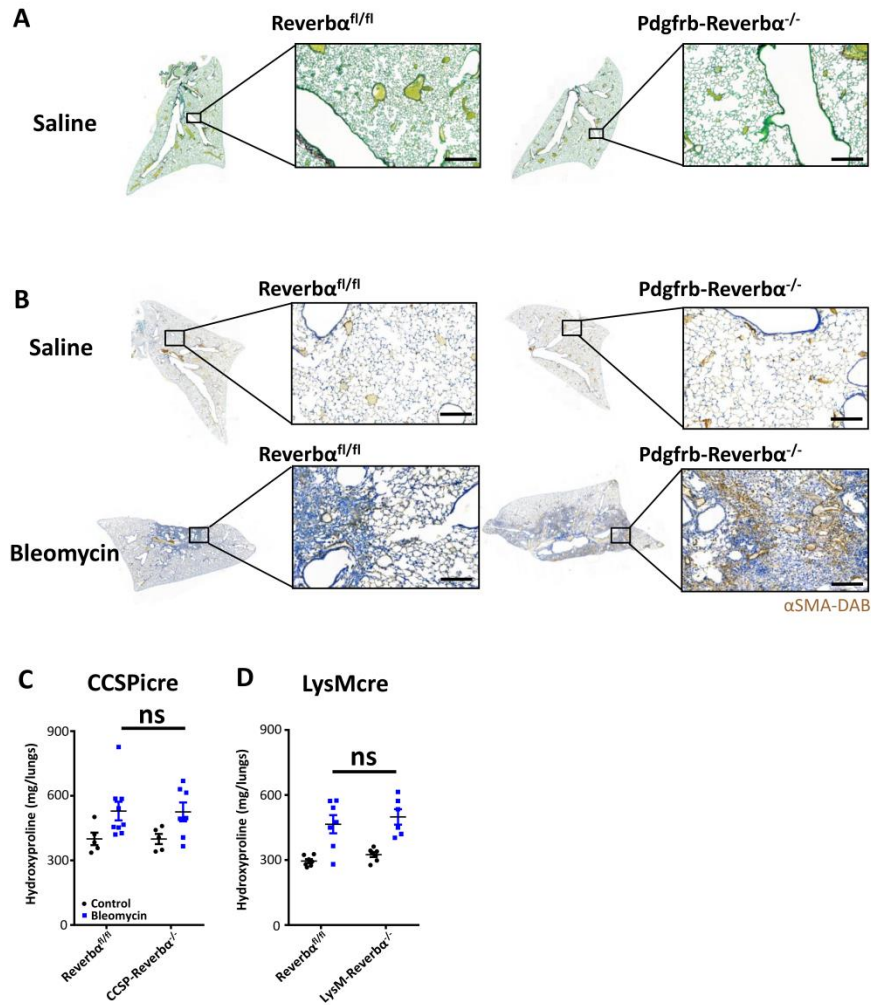

**Figure S4 - Myofibroblasts are increased in the *Pdgfrb-Reverba<sup>-/-</sup>* mouse, whereas conditional modulation of REVERB $\alpha$  in club cells or myeloid cells fails to alter the pulmonary fibrotic response to bleomycin.**

**A)** Histological image stained with Picrosirius red of representative tissue sections from saline treated mice (3 animals per genotype); scale bar, 200 $\mu$ m. **B)** Representative lung images after immunohistochemistry (anti- $\alpha$ SMA, 3,3'-Diaminobenzidine (DAB)) 28 days after intra-tracheal bleomycin or saline challenge (3 animals treated with saline and 4-5 animals treated with bleomycin per genotype; scale bar, 200 $\mu$ m). The bleomycin inset images have also been shown in Fig. 2D in the main manuscript **C)** Hydroxyproline measurements from *CCSP-Reverba<sup>-/-</sup>* vs littermate controls 28 days after intra-tracheal bleomycin (2U/kg) challenge (n=5 saline and 7-9 bleomycin per genotype, mean $\pm$ SEM) **D)** Hydroxyproline measurements from *LysM-Reverba<sup>-/-</sup>* mice vs littermate controls 28 days after intra-tracheal bleomycin (3U/kg) challenge (n=5 saline and 6-7 bleomycin per genotype, mean $\pm$ SEM).



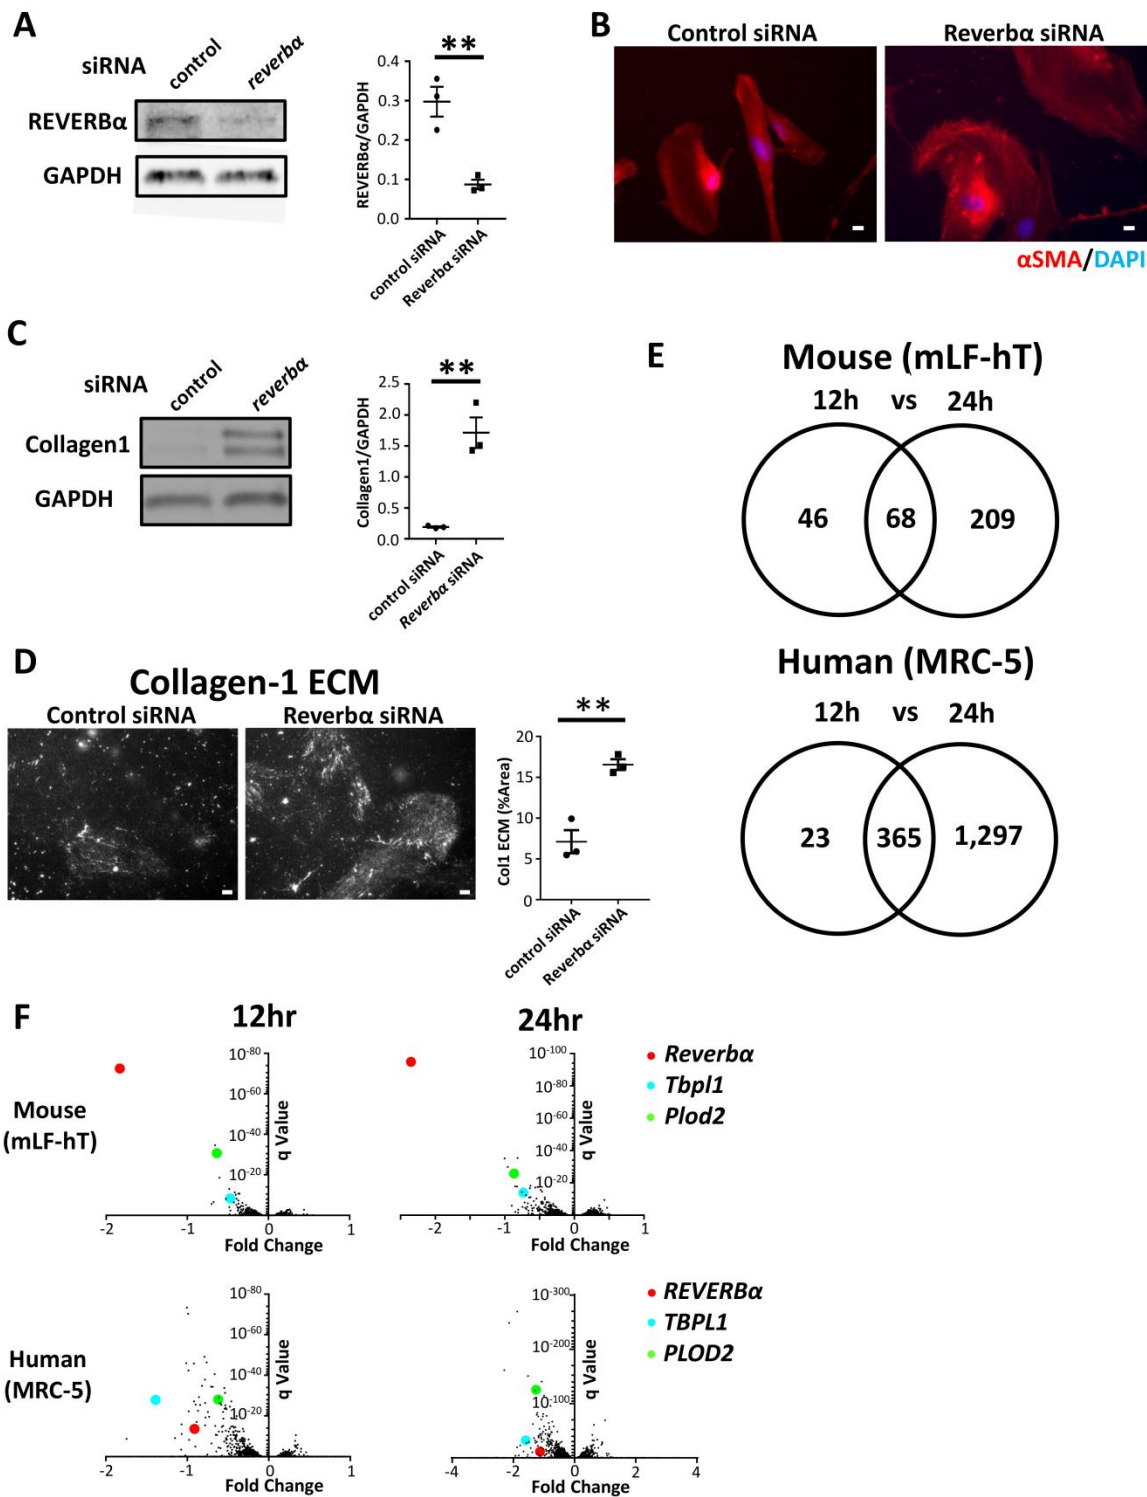

**Figure S5 – RNA-seq reveals REVERBα’s effect on TBPL1 expression**

**A)** Immunoblot for REVERBα following transfection of control (non-targeting) or *Reverba* siRNA in mLF-hT cells. (representative immunoblot along with quantification from n=3 transfections, \*\*=P<0.01 Student’s t-test, mean±SEM) **B)** Immunofluorescent staining for the myofibroblast marker αSMA after Control (non-targeting) or *REVERBα* siRNA knockdown

in MRC-5 cells; scale bar, 10 $\mu$ m (representative image from 3 separate transfections) **C)** Immunoblot along with quantification for Collagen-1 protein following transfection of control (non-targeting) or *REVERB $\alpha$*  siRNA knockdown in MRC-5 cells (n=3 transfections, \*\*=P<0.01 student t test, mean $\pm$ SEM) **D)** Immunofluorescent staining and quantification of Collagen-1 ECM deposition following transfection of control (non-targeting) or *Reverb $\alpha$*  siRNA knockdown in mLF-hT cells. (n=3 transfections, representative image shown, \*\*=P<0.01 Student t-test, mean $\pm$ SEM; scale bar, 50 $\mu$ m) **E)** Venn diagrams (12hrs Vs 24hrs) showing genes differentially (q<0.05) regulated using RNA-seq analysis in mLF-hT and MRC-5 cells following siRNA silencing of REVERB $\alpha$  (n=3 transfections per sampling point) **F)** Volcano plots (q value vs fold change) for each of the four RNA-seq experimental conditions from which the mean plot is shown in Fig. 3C (n=3 transfections for each cell line per sampling point).

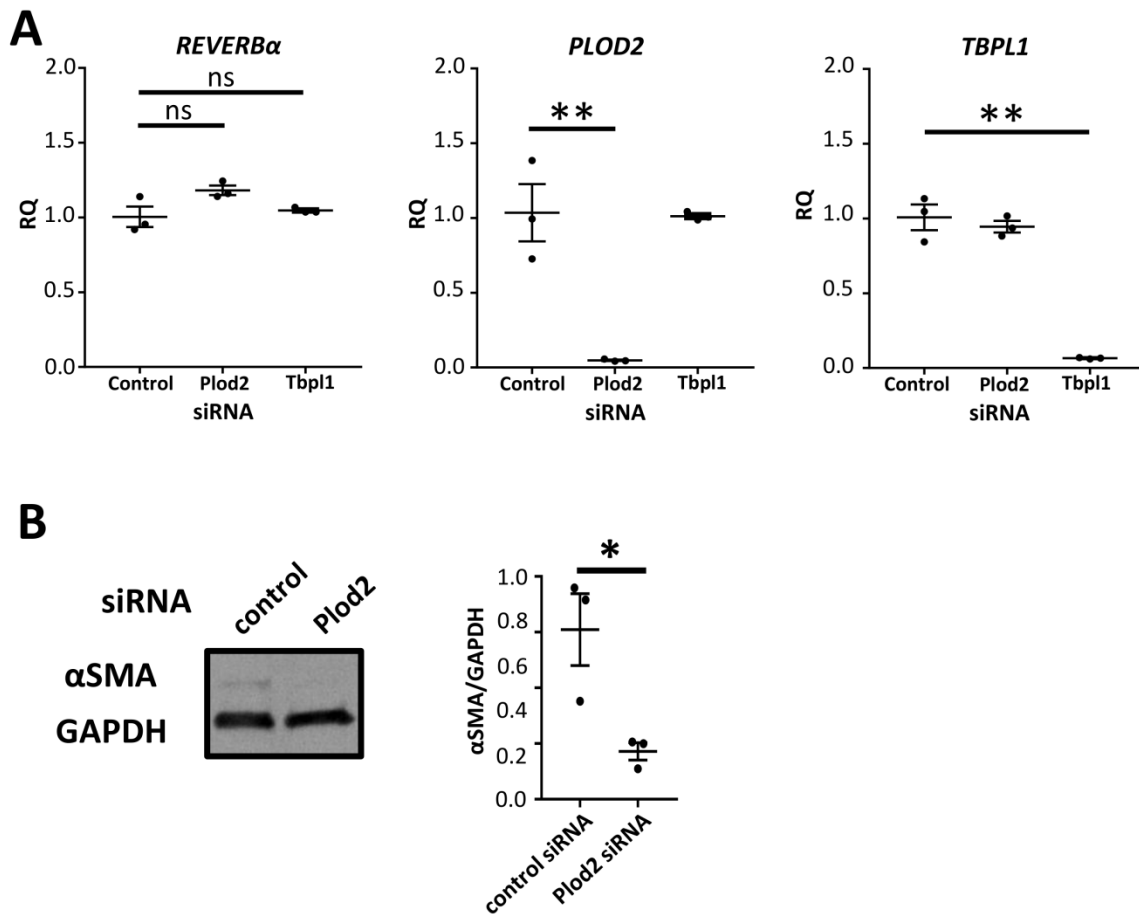

**Figure S6 – Effects of PLOD2 and TBPL1 siRNA knockdown**

**A)** PLOD2 or TBPL1 was knocked down in MRC-5 cells following siRNA transfection. *REVERBα*, *PLOD2* and *TBPL1* was measured by qPCR (n=3 transfections; \*\*=p<0.01, Student's t-test, mean±SEM). **B)** Representative immunoblot along with quantification of αSMA following *PLOD2* siRNA knockdown in MRC-5 cells. (representative immunoblot from 3 separate transfections, \*=p<0.05 Student's t-test, mean±SEM)

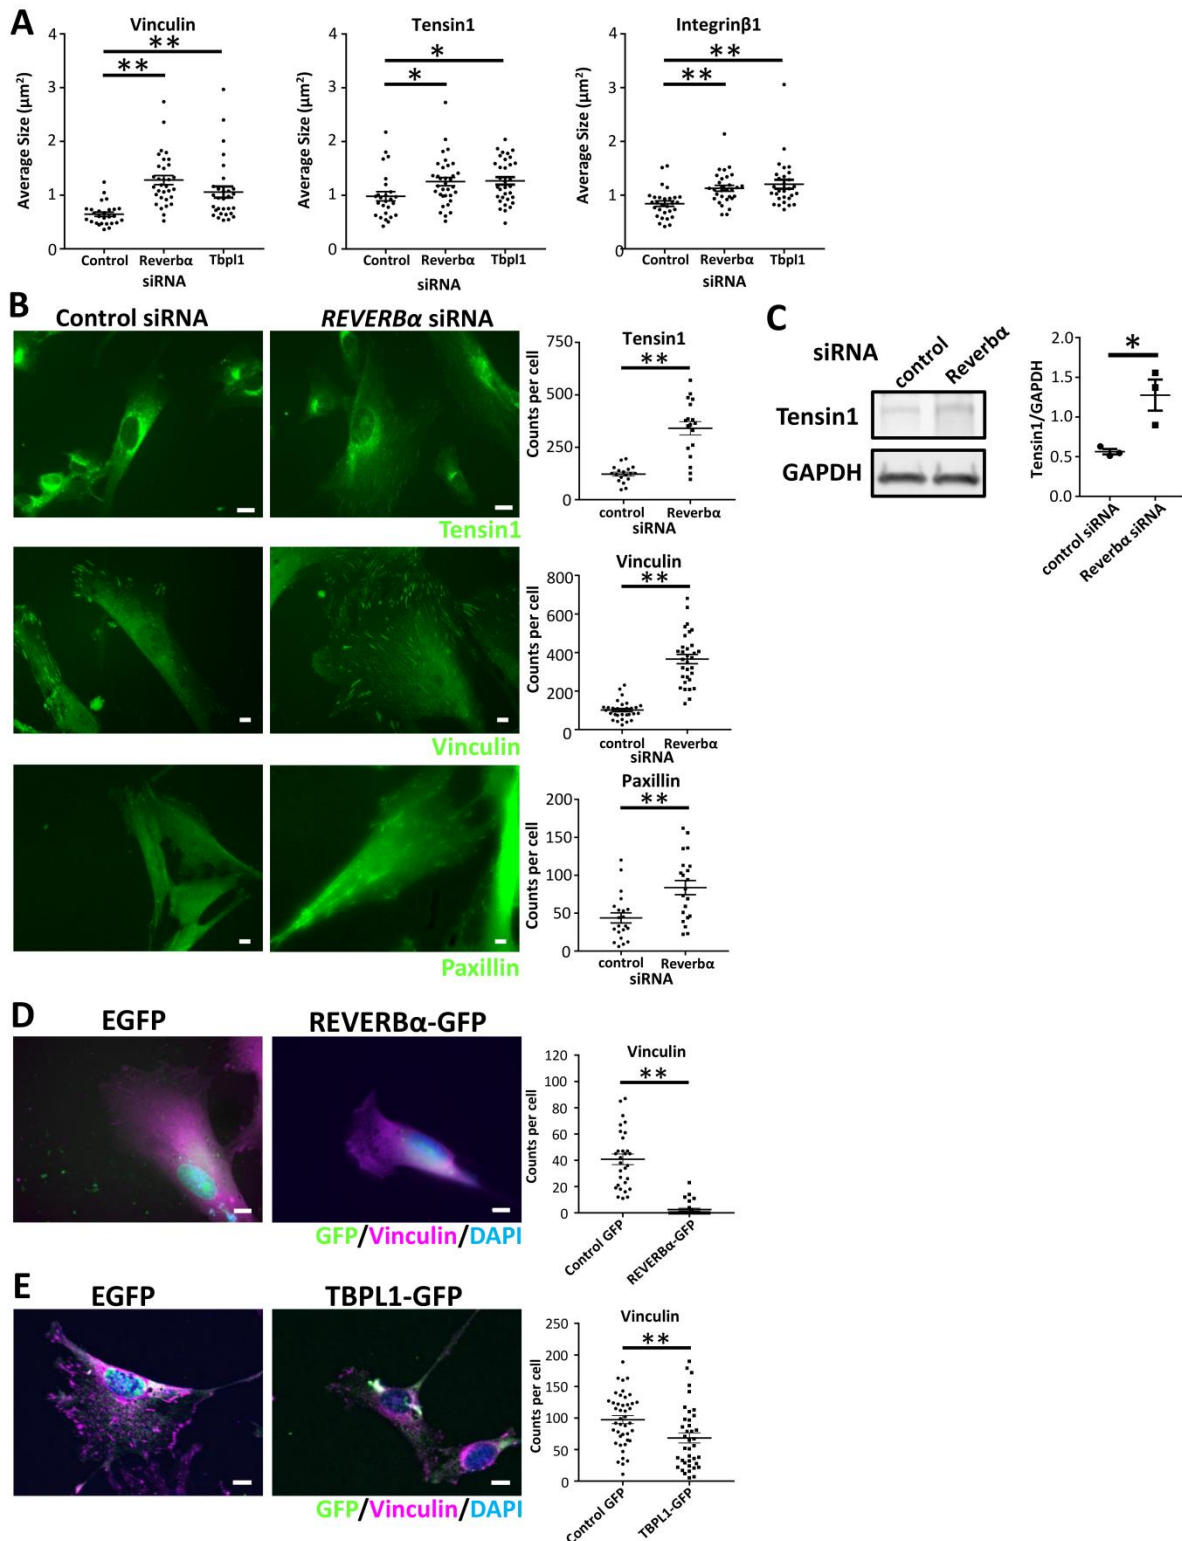

**Figure S7 – Characterization of cell changes in mLF-hT and Mrc5 cells following either REVERB $\alpha$  knockdown or REVERB $\alpha$ /TBPL1 overexpression.**

**A)** Quantification of, vinculin, tensin1 and integrin $\beta$ 1 average cluster size following siRNA knockdown of *Reverba* or *Tbp1* compared to control (non-targeting) siRNA in mLF-hT cells (\*= $p < 0.05$ , \*\*= $p < 0.01$ , one-way ANOVA, mean $\pm$ SEM •= individual cells from 3 transfections;



scale bar, 10 $\mu$ m **B)** Representative images and quantification of tensin-1, vinculin and paxillin immunofluorescence in MRC-5 cells following *REVERB $\alpha$*  or Control (non-targeting) siRNA knockdown. (\*\*=p<0.01 Student's t-test •= individual cells from 3 transfections; scale bar, 10 $\mu$ m) **C)** Representative immunoblot along with quantification of tensin1 following *REVERB $\alpha$*  or Control (non-targeting) siRNA knockdown in MRC-5 cells. (representative immunoblot from 3 separate transfections \*=p<0.05 Student's t-test, mean $\pm$ SEM) **D)** Representative immunofluorescence images following transfection with *REVERB $\alpha$* -GFP or eGFP along with quantification of focal adhesions (vinculin) in MRC5 cells. Cells were stained for GFP, Vinculin and nuclei (DAPI) (\*\*=p<0.01 student's t-test, mean $\pm$ SEM, •= individual cells from 3 separate transfections) **E)** Representative immunofluorescence images following transfection with *TBPL1*-GFP or eGFP along with quantification of focal adhesions (vinculin) in mLF-hT cells. Cells were stained for GFP, Vinculin and nuclei (DAPI) (\*\*=p<0.01 student's t-test, mean $\pm$ SEM, •= individual cells from 3 separate transfections).

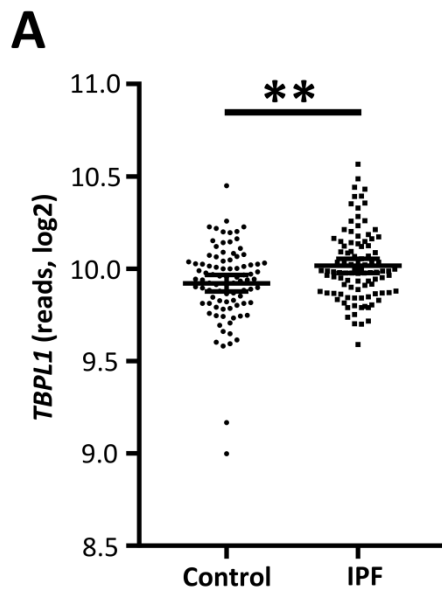

**Figure S8 – Characterization of *TBPL1* expression in human IPF.**

**A)** Changes in *TBPL1* gene expression in idiopathic pulmonary fibrosis compared to control subjects from a previously published genome array (GSE 47460)(7) (fold change  $\pm$  95% confidence interval, n= 90 controls and 98 patients with IPF, \*\*=p<0.01 student's t-test).

## **Supplementary Videos:**

### **Video S1: Per2 bioluminescence in WT mice after bleomycin**

Video showing bioluminescence over time in a precision cut lung slice in a WT mouse on a mPER2::luc background. The mouse was treated with intra-tracheal bleomycin 14 days before the lung slice was harvested.

### **Video S2: Per2 bioluminescence in CCSPicre-Bmal1<sup>-/-</sup> mice after bleomycin**

Video showing bioluminescence over time in a precision cut lung slice in a CCSPicre-Bmal1<sup>-/-</sup> on a mPER2::luc background. The mouse was treated with intra-tracheal bleomycin 14 days before the lung slice was harvested.

### **Video S3: Per2 bioluminescence in Pdgfrb-Bmal1<sup>-/-</sup> mice after bleomycin**

Video showing bioluminescence over time in a precision cut lung slice in a Pdgfrb-Bmal1<sup>-/-</sup> on a mPER2::luc background. The mouse was treated with intra-tracheal bleomycin 14 days before the lung slice was harvested.

### Supplementary Tables:

| Sleep duration (h) | Number of cases | Sample size | Odds Ratio | P value | 95% Confidence Interval |       |
|--------------------|-----------------|-------------|------------|---------|-------------------------|-------|
|                    |                 |             |            |         |                         |       |
| ≤4                 | 24              | 5,585       | 1.974      | <0.001  | 1.307                   | 2.981 |
| 5                  | 94              | 21,760      | 1.985      | <0.001  | 1.586                   | 2.483 |
| 6                  | 287             | 95,060      | 1.385      | <0.001  | 1.192                   | 1.610 |
| 7                  | 418             | 191,619     | 1          | -       | 1                       | 1     |
| 8                  | 404             | 143,771     | 1.289      | <0.001  | 1.124                   | 1.478 |
| 9                  | 133             | 28,982      | 2.109      | <0.001  | 1.734                   | 2.564 |
| 10                 | 43              | 7,027       | 2.816      | <0.001  | 2.056                   | 3.858 |
| ≥11                | 18              | 2,107       | 3.941      | <0.001  | 2.454                   | 6.330 |

**Table S1: Unadjusted association between Sleep duration and Pulmonary Fibrosis.** Odds ratios were calculated for the association between shift work and pulmonary fibrosis using binary logistic regression

| Variable   | Number of cases | Sample size | Odds Ratio | P value | 95% Confidence Interval |       |
|------------|-----------------|-------------|------------|---------|-------------------------|-------|
|            |                 |             |            |         |                         |       |
| ≤4h sleep  | 24              | 5,585       | 1.836      | 0.004   | 1.214                   | 2.776 |
| 5h sleep   | 94              | 21,760      | 1.808      | <0.001  | 1.444                   | 2.265 |
| 6h sleep   | 287             | 95,060      | 1.314      | <0.001  | 1.129                   | 1.528 |
| 7h sleep   | 418             | 191,619     | 1          | -       | 1                       | 1     |
| 8h sleep   | 404             | 143,771     | 1.134      | 0.074   | 0.988                   | 1.302 |
| 9h sleep   | 133             | 28,982      | 1.542      | <0.001  | 1.265                   | 1.880 |
| 10h sleep  | 43              | 7,027       | 1.947      | <0.001  | 1.414                   | 2.682 |
| ≥11h sleep | 18              | 2,107       | 3.149      | <0.001  | 1.955                   | 5.071 |
| Age        | -               | -           | 1.100      | <0.001  | 1.091                   | 1.110 |
| Male Sex   | -               | -           | 1.421      | <0.001  | 1.276                   | 1.583 |
| BMI        | -               | -           | 1.029      | <0.001  | 1.017                   | 1.040 |
| Smoking    | -               | -           | 2.059      | <0.001  | 1.849                   | 2.292 |

**Table S2: Adjusted association between Sleep duration and Pulmonary Fibrosis:** Odds ratios were calculated for the association between shift work and pulmonary fibrosis using binary logistic regression after adjusting for confounders (sex, age, BMI and smoking)

| <b>Chronotype</b> | <b>Number of cases</b> | <b>Sample size</b> | <b>Odds Ratio</b> | <b>P value</b> | <b>95% Confidence Interval</b> |       |
|-------------------|------------------------|--------------------|-------------------|----------------|--------------------------------|-------|
| Morning           | 753                    | 276,533            | 1                 | -              | -                              | -     |
| Evening           | 493                    | 165,515            | 1.030             | 0.121          | 0.992                          | 1.070 |

**Table S3: Unadjusted Association between Chronotype and Pulmonary Fibrosis:** Odds ratios were calculated for the association between evening chronotype and pulmonary fibrosis using binary logistic regression using volunteers from the UK biobank

| <b>Variable</b>    | <b>Number of cases</b> | <b>Sample size</b> | <b>Odds Ratio</b> | <b>P value</b> | <b>95% Confidence Interval</b> |       |
|--------------------|------------------------|--------------------|-------------------|----------------|--------------------------------|-------|
| Morning Chronotype | 753                    | 276,533            | 1                 | -              | 1                              | 1     |
| Evening Chronotype | 493                    | 165,515            | 1.040             | 0.047          | 1.001                          | 1.080 |
| Age                | -                      | -                  | 1.103             | <0.001         | 1.093                          | 1.113 |
| Male Sex           | -                      | -                  | 1.387             | <0.001         | 1.556                          | 1.237 |
| BMI                | -                      | -                  | 1.035             | <0.001         | 1.023                          | 1.047 |
| Smoking            | -                      | -                  | 2.128             | <0.001         | 1.896                          | 2.388 |

**Table S4: Adjusted association between Chronotype and Pulmonary Fibrosis:** Odds ratios were calculated for the association between evening chronotype and pulmonary fibrosis using binary logistic regression after adjusting for confounders (sex, age, BMI and smoking)

| Shift work | Number of cases | Sample size | Odds Ratio | P value | 95% Confidence Interval |       |
|------------|-----------------|-------------|------------|---------|-------------------------|-------|
| None       | 335             | 236,190     | 1          | -       | 1                       | 1     |
| Yes        | 90              | 49,370      | 1.286      | 0.034   | 1.019                   | 1.623 |

**Table S5: Unadjusted association between Shift work and Pulmonary Fibrosis:** Odds ratios were calculated for the association between shift work and pulmonary fibrosis using binary logistic regression

| Variable      | Number of cases | Sample size | Odds Ratio | P value | 95% Confidence Interval |       |
|---------------|-----------------|-------------|------------|---------|-------------------------|-------|
| No Shift work | 335             | 236,190     | 1          | -       | 1                       | 1     |
| Shift Work    | 90              | 49,370      | 1.353      | 0.012   | 1.069                   | 1.711 |
| Age           | -               | -           | 1.106      | <0.001  | 1.090                   | 1.122 |
| Sex           | -               | -           | 1.238      | 0.032   | 1.017                   | 1.506 |
| BMI           | -               | -           | 1.031      | 0.003   | 1.010                   | 1.052 |
| Smoking       | -               | -           | 1.622      | <0.001  | 1.336                   | 1.968 |

**Table S6: Adjusted association between Shift work and Pulmonary Fibrosis:** Odds ratios were calculated for the association between shift work and pulmonary fibrosis using binary logistic regression after adjusting for confounders (sex, age, BMI and smoking)

## Supplementary References

1. Allen N, *et al.* (2012) UK Biobank: Current status and what it means for epidemiology. *Health Policy and Technology* 1(3):123-126.
2. Herbert A, Wijlaars L, Zylbersztejn A, Cromwell D, & Hardelid P (2017) Data Resource Profile: Hospital Episode Statistics Admitted Patient Care (HES APC). *Int J Epidemiol* 46(4):1093-1093i.
3. Lane JM, *et al.* (2016) Genome-wide association analysis identifies novel loci for chronotype in 100,420 individuals from the UK Biobank. *Nat Commun* 7:10889.
4. Mongrain V, Lavoie S, Selmaoui B, Paquet J, & Dumont M (2004) Phase relationships between sleep-wake cycle and underlying circadian rhythms in Morningness-Eveningness. *J Biol Rhythms* 19(3):248-257.
5. Lane JM, *et al.* (2017) Genome-wide association analyses of sleep disturbance traits identify new loci and highlight shared genetics with neuropsychiatric and metabolic traits. *Nat Genet* 49(2):274-281.
6. Barrett T, *et al.* (2013) NCBI GEO: archive for functional genomics data sets--update. *Nucleic Acids Res* 41(Database issue):D991-995.
7. Yu G, *et al.* (2018) Thyroid hormone inhibits lung fibrosis in mice by improving epithelial mitochondrial function. *Nat Med* 24(1):39-49.
8. Wynn TA, *et al.* (2011) Quantitative assessment of macrophage functions in repair and fibrosis. *Curr Protoc Immunol* Chapter 14:Unit14 22.
9. Gibbs J, *et al.* (2014) An epithelial circadian clock controls pulmonary inflammation and glucocorticoid action. *Nat. Med.* 20(8):919-926.
10. Liu H, Shah S, & Jiang W (2004) On-line outlier detection and data cleaning. *Computers & Chemical Engineering* 28(9):1635-1647.
11. Yamazaki S & Takahashi JS (2005) Real-time luminescence reporting of circadian gene expression in mammals. *Methods Enzymol* 393:288-301.
12. Smith-Clerc J & Hinz B (2010) Immunofluorescence detection of the cytoskeleton and extracellular matrix in tissue and cultured cells. *Methods Mol Biol* 611:43-57.
13. Schindelin J, *et al.* (2012) Fiji: an open-source platform for biological-image analysis. *Nat Methods* 9(7):676-682.
14. Pariollaud M, *et al.* (2018) Circadian clock component REV-ERB $\alpha$  controls homeostatic regulation of pulmonary inflammation. *J Clin Invest* 128(6):2281-2296.
15. Olson AL, Gifford AH, Inase N, Fernandez Perez ER, & Suda T (2018) The epidemiology of idiopathic pulmonary fibrosis and interstitial lung diseases at risk of a progressive-fibrosing phenotype. *Eur Respir Rev* 27(150).
16. Yoo SH, *et al.* (2004) PERIOD2::LUCIFERASE real-time reporting of circadian dynamics reveals persistent circadian oscillations in mouse peripheral tissues. *Proc Natl Acad Sci U S A* 101(15):5339-5346.
17. Henderson NC, *et al.* (2013) Targeting of  $\alpha$ v integrin identifies a core molecular pathway that regulates fibrosis in several organs. *Nat Med* 19(12):1617-1624.
18. Lodyga M, *et al.* (2019) Cadherin-11-mediated adhesion of macrophages to myofibroblasts establishes a profibrotic niche of active TGF- $\beta$ . *Sci Signal* 12(564).
19. Meng QJ, *et al.* (2008) Ligand modulation of REV-ERB $\alpha$  function resets the peripheral circadian clock in a phasic manner. *J Cell Sci.* 121(Pt 21):3629-3635.
